# Supplementary material for: [Ru(triphos)(CH3CN)3](OTf)2 as a homogeneous catalyst for the hydrogenation of biomass derived 2,5-hexanedione and 2,5-dimethyl-furan in aqueous acidic medium
Source: Royal Society of Chemistry journal article supplement (doi:10.1039/c7gc01956d), 2017-01-01
Supplement: c7gc01956d1.xlsx [file c7gc01956d1.xlsx]

## Sheet: H2 in Water Kirov
Column1	0	50	100	150	200	250	300	350	370	Column2			Column1		273.15	323.15	373.15	423.15	473.15	523.15	573.15	623.15	643.15	Column2
P(vapour + gas) [MPa]	[°]	[°]	[°]	[°]	[°]	[°]	[°]	[°]	[°]				P(vapour + gas) [Pa]	psi	K	K	K	K	K	K	K	K	K
0.1	0.0212	0.0127	0	0	0	0	0	0	0	[cm3/g]			100000	14.5038	0.0473214	0.0283482	0	0	0	0	0	0	0	[mmol]
0.5	0.106	0.0789	0.0645	0	0	0	0	0	0	[cm3/g]			500000	72.5189	0.236607	0.176116	0.143973	0	0	0	0	0	0	[mmol]
1	0.218	0.156	0.148	0.104	0	0	0	0	0	[cm3/g]			1000000	145.038	0.486607	0.348214	0.330357	0.232143	0	0	0	0	0	[mmol]
2.5	0.537	0.408	0.393	0.421	0.27	0	0	0	0	[cm3/g]			2500000	362.594	1.19866	0.910714	0.877232	0.939732	0.602679	0	0	0	0	[mmol]
5	1.069	0.814	0.81	0.942	0.982	0.401	0	0	0	[cm3/g]			5000000	725.189	2.38616	1.81696	1.80804	2.10268	2.19196	0.895089	0	0	0	[mmol]
10	2.136	1.629	1.638	1.993	2.414	2.594	1.09	0	0	[cm3/g]			10000000	1450.38	4.76786	3.63616	3.65625	4.44866	5.38839	5.79018	2.43304	0	0	[mmol]
15	3.171	2.471	2.441	3.042	3.825	4.735	4.805	0	0	[cm3/g]			15000000	2175.57	7.07812	5.51563	5.44866	6.79018	8.53795	10.5692	10.7254	0	0	[mmol]
20	4.19	3.209	3.247	4.074	5.247	6.85	8.413	5.721	0	[cm3/g]			20000000	2900.75	9.35268	7.16295	7.24777	9.09375	11.7121	15.2902	18.779	12.7701	0	[mmol]
30	6.172	4.726	4.826	6.145	8.235	11.097	15.426	19.231	18.157	[cm3/g]			30000000	4351.13	13.7768	10.5491	10.7723	13.7165	18.3817	24.7701	34.433	42.9263	40.529	[mmol]
40	8.055	6.214	6.367	8.232	10.993	15.398	22.255	33.383	36.744	[cm3/g]			40000000	5801.51	17.9799	13.8705	14.2121	18.375	24.5379	34.3705	49.6763	74.5156	82.0179	[mmol]
50	9.839	7.64	7.857	10.313	13.826	19.877	30.565	50.218	62.031	[cm3/g]			50000000	7251.89	21.9621	17.0536	17.5379	23.0201	30.8616	44.3683	68.2254	112.094	138.462	[mmol]
													Conversion factors:
													Volume		22.4	[cm^3/mmol]		Mass		Catalyst
													R		8.31446	[J/(k*mol)]		50	g	Catalyst Concentration		1	mmol/L
													1 psi = Pa		6894.76	[Pa/psi]		0.05	kg	Catalyst Absolute mmols		0.05	mmol/L
													1 ccm		0.001	L		5e-05	tons
													1 L		0.001	m3				Check for diffusion limitation:
																				p(H2) [psi]	Molar Ratio H2/catalyst
																				145.038	4.64286
																				362.594	18.7946
																				725.189	42.0536
																				1450.38	88.9732
																				2175.57	135.804
																				2900.75	181.875
	Total Pressure		273.15	323.15	373.15	423.15	473.15	523.15	573.15	623.15	643.15	Mass/ Volume
	P(vapour + gas) [Pa]		K	K	K	K	K	K	K	K	K
	100000		999.844	988.047								kg/m3
	500000		1000.05	988.221	958.541							kg/m3
	1000000		1000.3	988.438	958.775	917.304						kg/m3
	2500000		1001.06	989.088	959.475	918.153	865.388					kg/m3
	5000000		1002.32	990.167	960.635	917.588	867.27	800.081				kg/m3
	10000000		1004.82	992.309	962.932	919.555	870.947	805.701	715.29			kg/m3
	15000000		1007.3	994.429	965.197	925.029	874.511	811.024	725.553			kg/m3
	20000000		1009.74	996.528	967.433	927.688	877.974	816.087	734.706	600.649		kg/m3
	30000000		1014.54	1000.66	971.819	932.863	884.623	825.551	750.644	643.955	579.022	kg/m3
	40000000		1019.24	1004.71	976.096	937.863	890.943	834.279	764.345	671.865	623.15	kg/m3
	50000000		1023.82	1008.69	980.268	942.7	896.975	842.404	776.462	693.271	652.345	kg/m3

## Sheet: H2 in Water Minnich
1 psi = Pa	6894.76	[Pa/psi]
		T [°F]
		75	125	300	345	390	435	500	600	650
		T [°C]
		23.8889	51.6667	148.889	173.889	198.889	223.889	260	315.556	343.333
		T [K]
		297.039	324.817	422.039	447.039	472.039	497.039	533.15	588.706	616.483
Pressure H2 [psi]	Pressure H2 [MPa]
100	0.689476			0.13	0.15	0.18	0.22	0.39	0.65	1.4
200	1.37895		0.33	0.28	0.3	0.34	0.49	0.91	1.32
300	2.06843	0.32	0.41	0.4	0.43	0.52	0.75	1.25	2.01
375	2.58553		0.45	0.52	0.56	0.68	0.94
500	3.44738			0.7	0.75		1.26

## Sheet: H2 in 1,4-dioxane
1 psi = Pa	6894.76	[Pa/psi]
	Mole Fractions * 10^2					Mole Fractions actual							1,4-dioxane MW		88.107	[g/mol]		mmol of hydrogen in			50		mL of 1,4-dioxane
		T [°C]					T [°C]						T [°C]						T [°C]
		25	50	100			25	50	100				25	50	100				25		50		100
		T [K]					T [K]						T [K]						T [K]	Molar Ratio H2/cat		Molar Ratio H2/cat		Molar Ratio H2/cat
	p [MPa]	298.15	323.15	373.15		p [MPa]	298.15	323.15	373.15				298.15	323.15	373.15		p [psi]	p [MPa]	298.15		323.15		373.15
	0.0016		0			0.0016	0	0	0			Density [g/ccm]	1.028	0.9994	0.9417		0.23206	0.0016	0		0		0
	0.0049	0				0.0049	0	0	0			Volume [ccm]	50				0.710685	0.0049	0		0		0
	0.09			0		0.09	0	0	0			1,4-dioxane [g]	51.4	49.97	47.085		13.0534	0.09	0		0		0
	0.101325	0.0184	0.0229	0.0329		0.101325	0.000184	0.000229	0.000329			1,4-dioxane[mmol]	583.382	567.151	534.407		14.6959	0.101325	0.107362	2.14724	0.133625	2.6725	0.191996	3.83991
	1.895	0.345				1.895	0.00345	0	0								274.847	1.895	2.01963	40.3927	0	0	0	0
	2.78			0.896		2.78	0	0	0.00896								403.205	2.78	0	0	0	0	5.27436	105.487
	2.86		0.648			2.86	0	0.00648	0								414.808	2.86	0	0	3.80497	76.0994	0	0
	5.71		1.297			5.71	0	0.01297	0								828.165	5.71	0	0	7.66589	153.318	0	0
	6.38			2.049		6.38	0	0	0.02049								925.341	6.38	0	0	0	0	12.2035	244.071
	6.585	1.205				6.585	0.01205	0	0								955.074	6.585	7.11549	142.31	0	0	0	0
	9.12			2.914		9.12	0	0	0.02914								1322.74	9.12	0	0	0	0	17.51	350.2
	9.46	1.707				9.46	0.01707	0	0								1372.06	9.46	10.1313	202.625	0	0	0	0
	9.94		2.248			9.94	0	0.02248	0								1441.68	9.94	0	0	13.416	268.32	0	0
												Check for diffusion limitation:
												Catalyst
												Concentration		1	mmol/L
												Absolute mmols		0.05	mmol/L
												Molar Ratio H2/cat		3.83991	at pressure:	14.6959	psi
